# Supplementary material for: CEACAM1 regulates the IL-6 mediated fever response to LPS through the RP105 receptor in murine monocytes
Source: Springer Nature journal article supplement (doi:10.1186/s12865-019-0287-y), 2019-01-23
Supplement: MOESM1 [file 16415554]

# **Regulation of the IL-6 mediated fever response to LPS in murine monocytes is regulated by CEACAM1 and the RP105 receptor**

Zhifang Zhang\*, Deirdre La Placa, Tung Nguyen, Maciej Kujawski,  
Keith Le, Lin Li, and John E. Shively\*

Department of Molecular Imaging and Therapy,  
Beckman Research Institute of City of Hope  
1500E Duarte Road, Duarte, CA91010, USA

\*Correspondence: [zzhang@coh.org](mailto:zzhang@coh.org) ; [jshively@coh.org](mailto:jshively@coh.org)

**Supplementary Figures and Figure Legends**

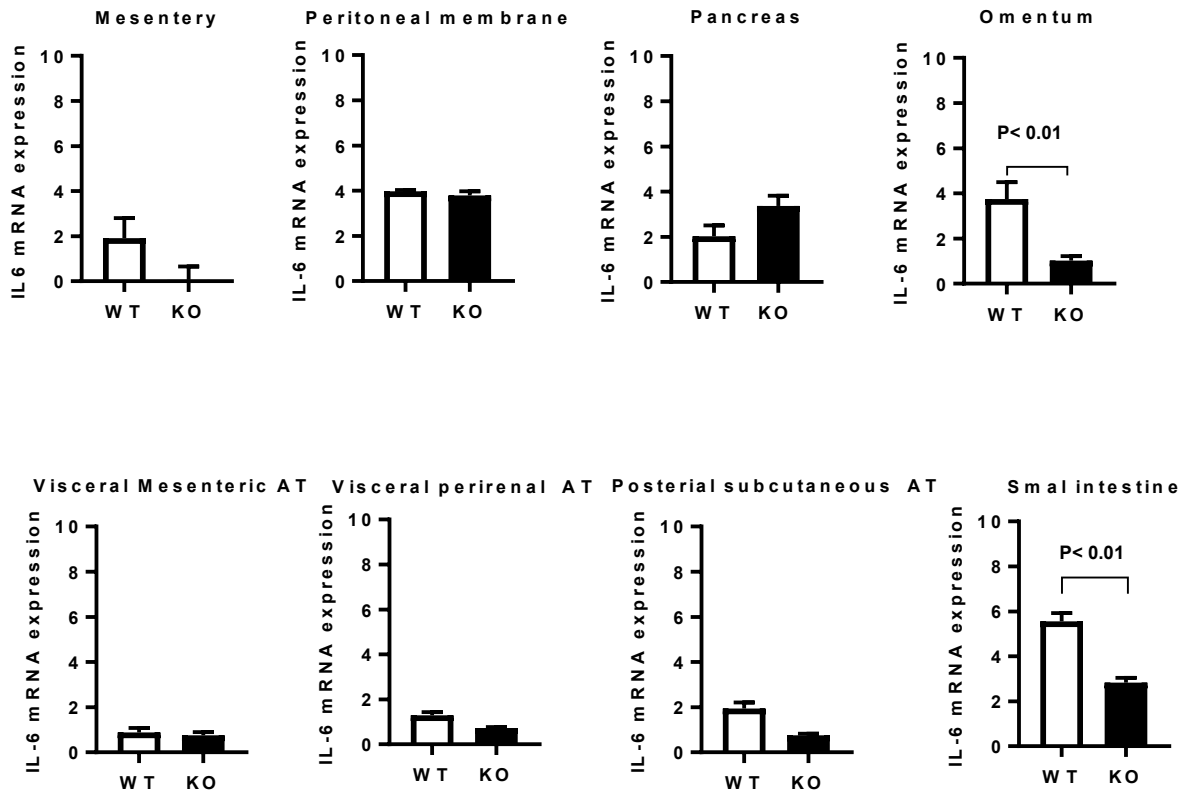

**Figure S1. *IL-6* mRNA expression in peritoneal cavity tissues after LPS challenge.** *IL-6* mRNA expression levels of indicated tissues by RT-PCR after i.p. injection of LPS (10 mg/kg) for 2 hours (n=4). AT= adipose tissue.

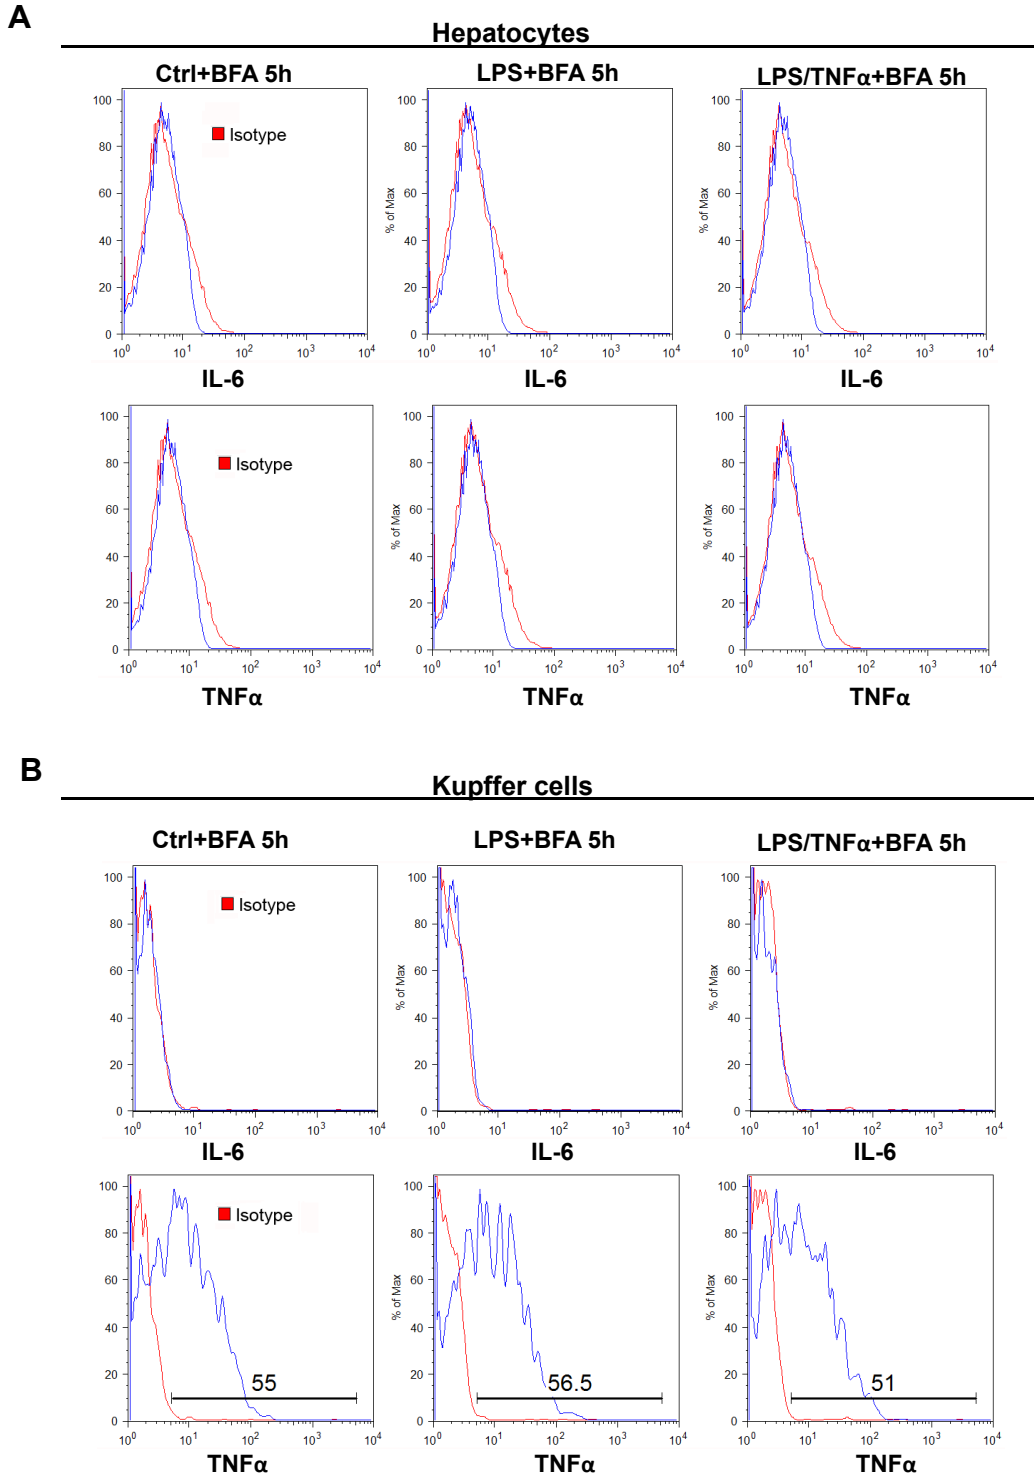

**Figure S2. Intracellular IL-6 and TNF $\alpha$  staining of hepatocytes and Kupffer cells in response to LPS in *Ceacam1*<sup>-/-</sup> mice.**  
 (A) Intracellular IL-6 and TNF $\alpha$  staining of hepatocytes after treatment with Brefeldin A plus LPS (500ng/mL) or LPS+TNF $\alpha$  (20ng/mL) for 5 hours (n=3).  
 (B) Intracellular IL-6 and TNF $\alpha$  staining of Kupffer cells after treatment with BFA plus LPS (500ng/mL) or LPS+TNF $\alpha$  (20ng/mL) for 5 hours (n=3).

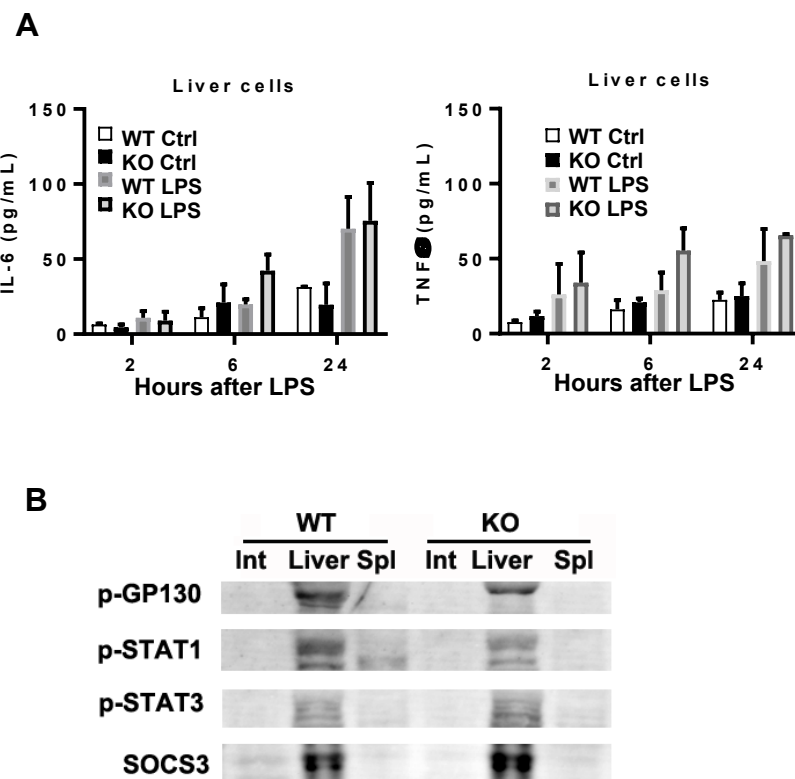

**Figure S3. IL-6 and TNF $\alpha$  levels of liver cells after LPS treatment in vitro and IL-6 receptor downstream signaling activation after i.p. LPS in vivo**  
 (A) IL-6 and TNF $\alpha$  release from liver cells after treatment with LPS (500ng/mL) over time in vitro (n=3).  
 (B) immunoblot of pGP130, pSTAT3, pSTAT1 and pSOCS1 in small intestine (Int), liver and spleen (Spl) after i.p. 10mg/mL LPS treatment for 2 hours in vivo (n=3).

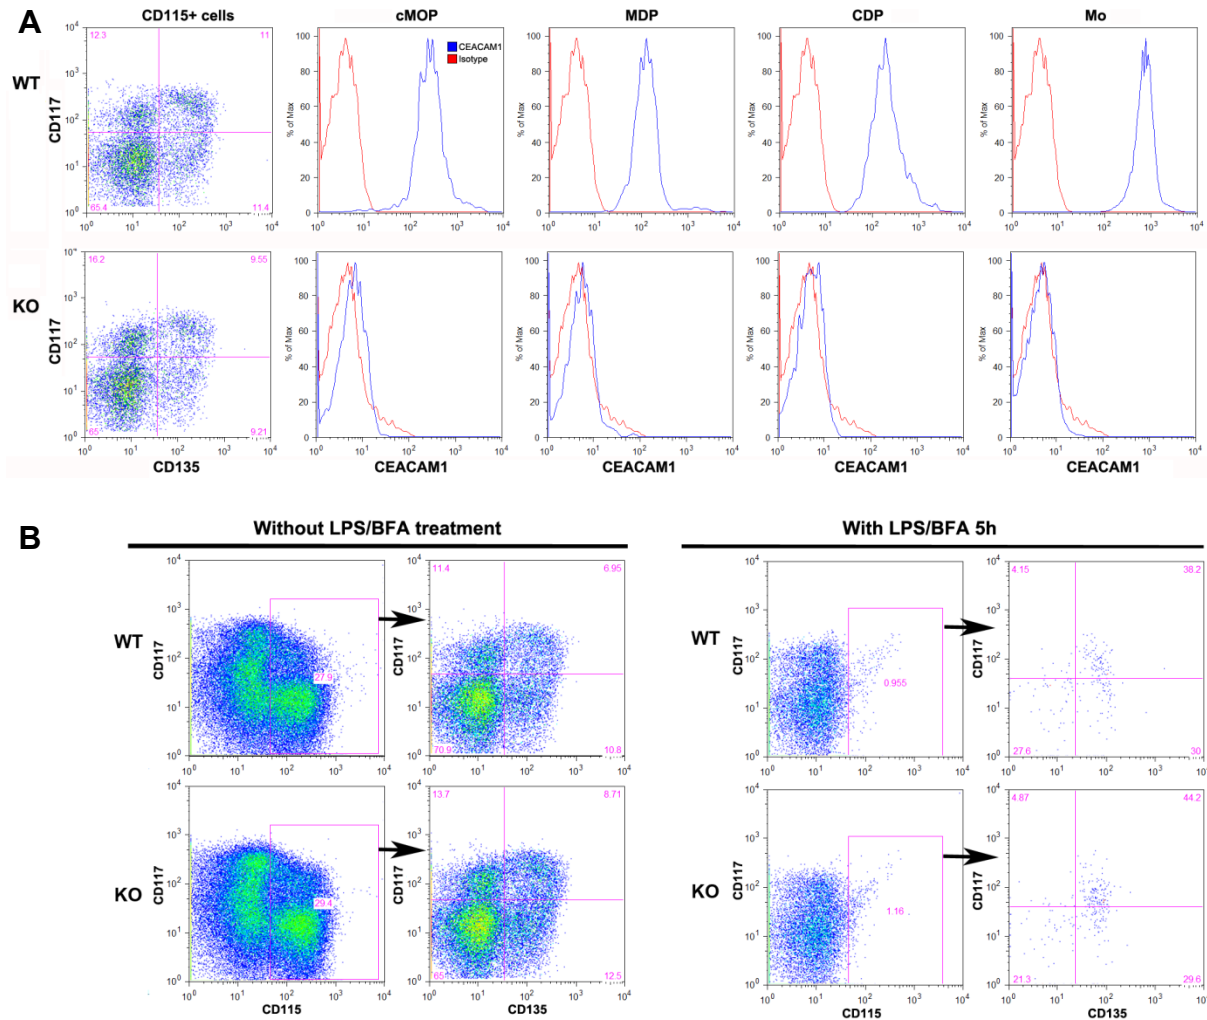

**Figure S4. CEACAM1 expression on bone marrow CD115<sup>+</sup> (M-CSF<sup>+</sup>) cells and CD115<sup>+</sup> cell pattern change of bone marrow cells after treated with LPS + BFA.**

(A) Surface CEACAM1 staining of monocytes (Mo), common monocyte progenitors (cMoP), monocyte-macrophage DC progenitors (MDP) and common DC precursors (CDP) of CD115<sup>+</sup> bone marrow cells in WT and *Ceacam1*<sup>-/-</sup> (KO) mice (n=4).

(B) Flow analysis of CD115, CD117, and CD135 of bone marrow cells treated with LPS +BFA for 5 hours in vitro (n=3).

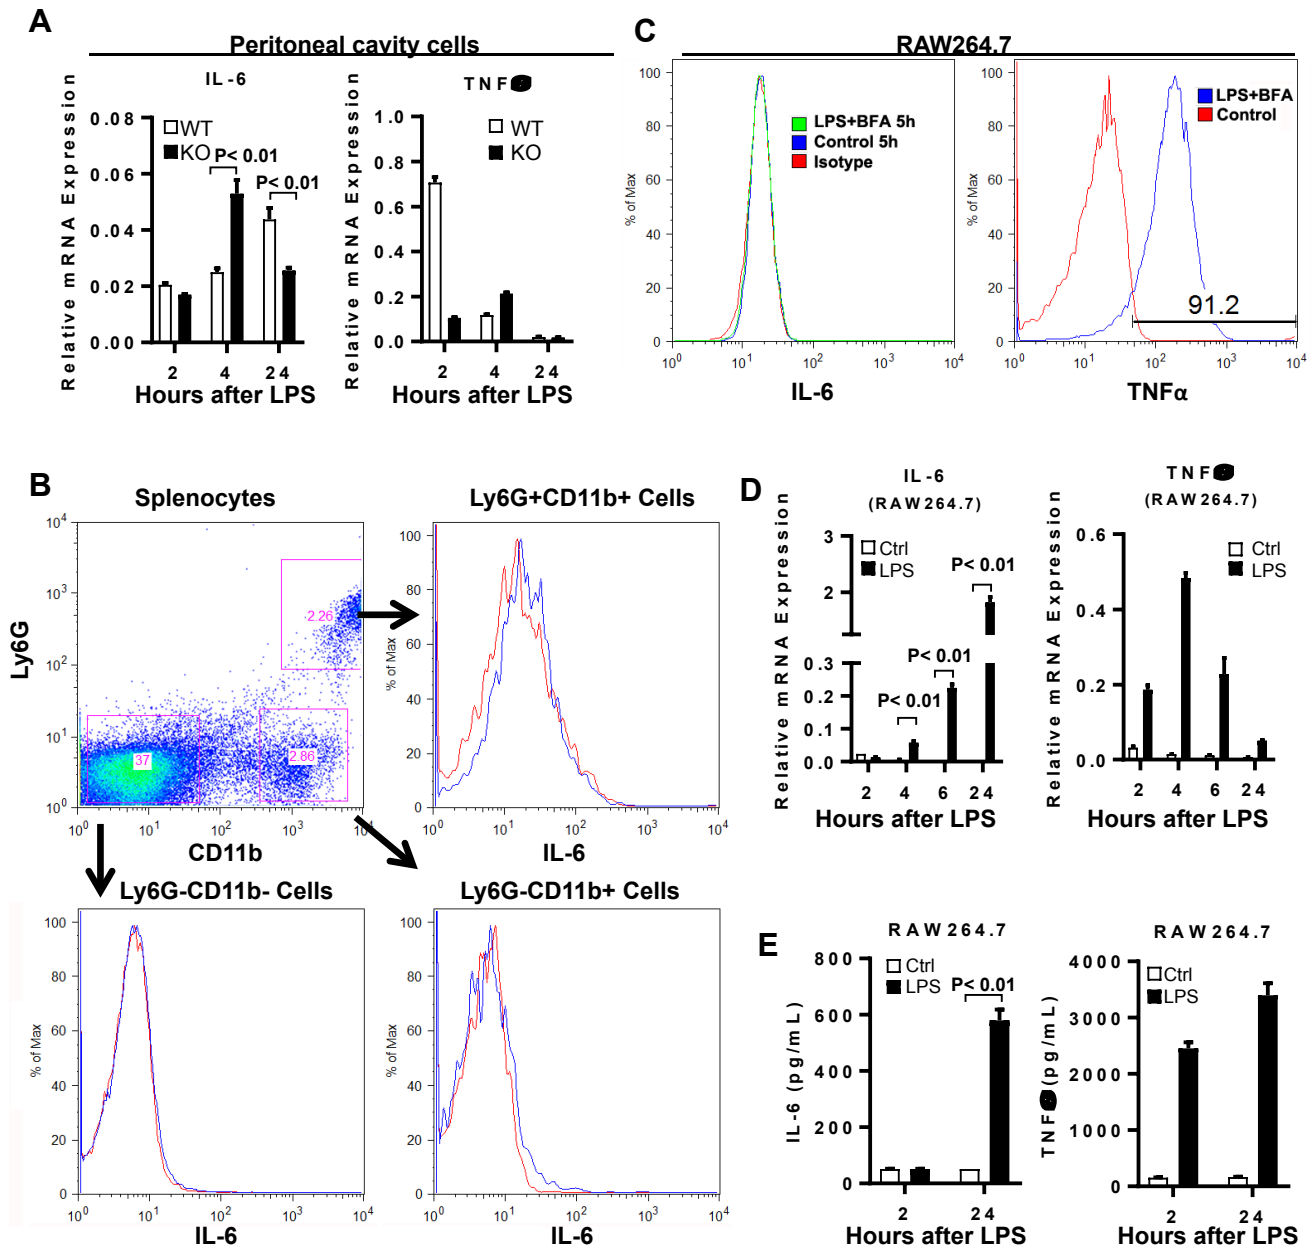

**Figure S5. Macrophages are not involved in the early IL-6 response (<2 hours) to LPS.**

(A) *IL-6* mRNA and *TNFα* mRNA expression levels in peritoneal cavity macrophages treated with 500ng/mL LPS in vitro (n=3).

(B) Intracellular staining of IL-6 in the splenocytes of *Ceacam1*<sup>-/-</sup> mice treated with Brefeldin A (BFA) plus LPS for 5 hours in vitro (n=3).

(C) Intracellular staining of IL-6 and *TNFα* in RAW264.7 cells treated with BFA plus LPS for 5 hours in vitro (n=3).

(D) *IL-6* mRNA and *TNFα* mRNA expression levels in RAW264.7 cells treated with 500ng/mL LPS over time (n=3).

(E) IL-6 protein level in supernatant of RAW264.7 cells treated with 500ng/mL LPS in vitro (n=3).

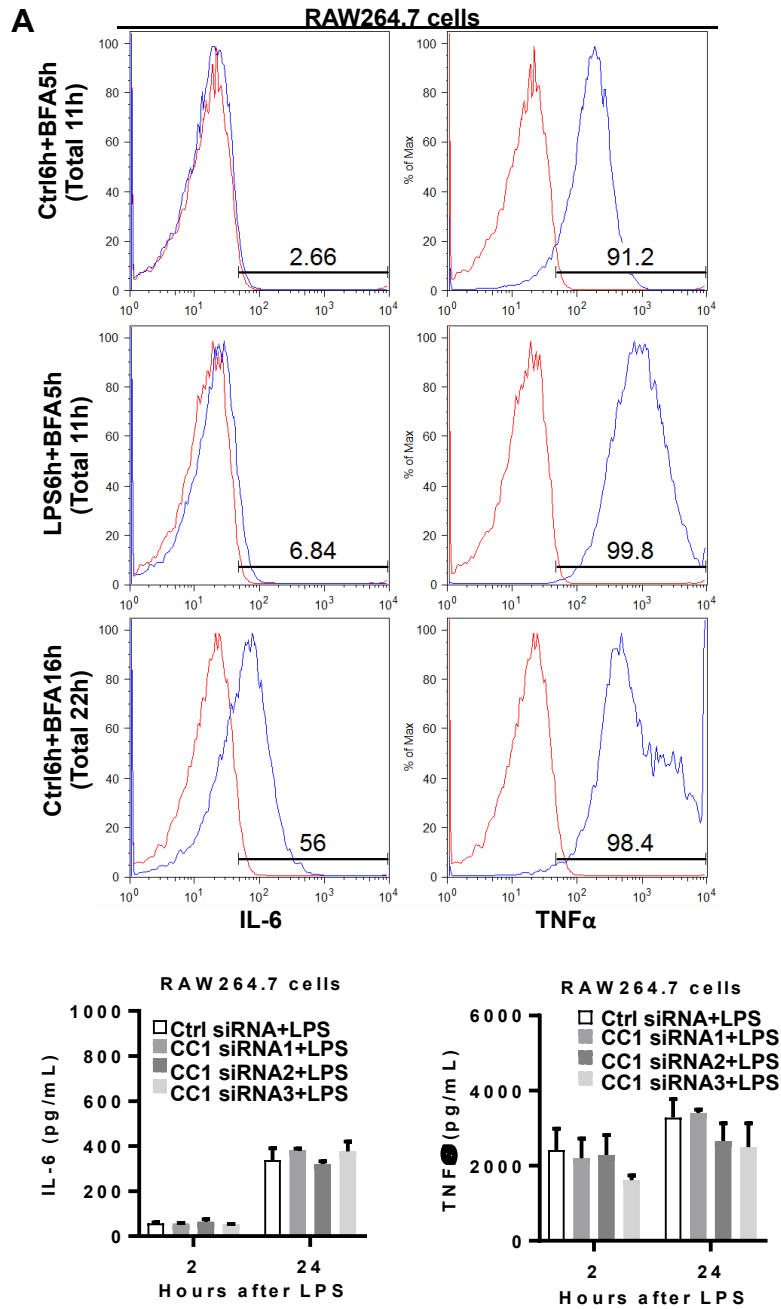

**Figure S6. RAW264.7 cells start to produce IL-6 after treatment with LPS+BFA for 11 hour, while silencing of CEACAM1 does not affect IL-6 production in murine macrophage RAW264.7 cells at the 2 hour and 24 hour time points.**

(A) Intracellular IL-6 and TNF $\alpha$  staining of RAW264.7 cells after treated with LPS over time shown in the figure (n=3).

(B) Silencing of CEACAM1 by RNAi does not affect IL-6 and TNF $\alpha$  production in murine macrophage RAW264.7 cells at the 2 hr and 24 hr time points (n=3).

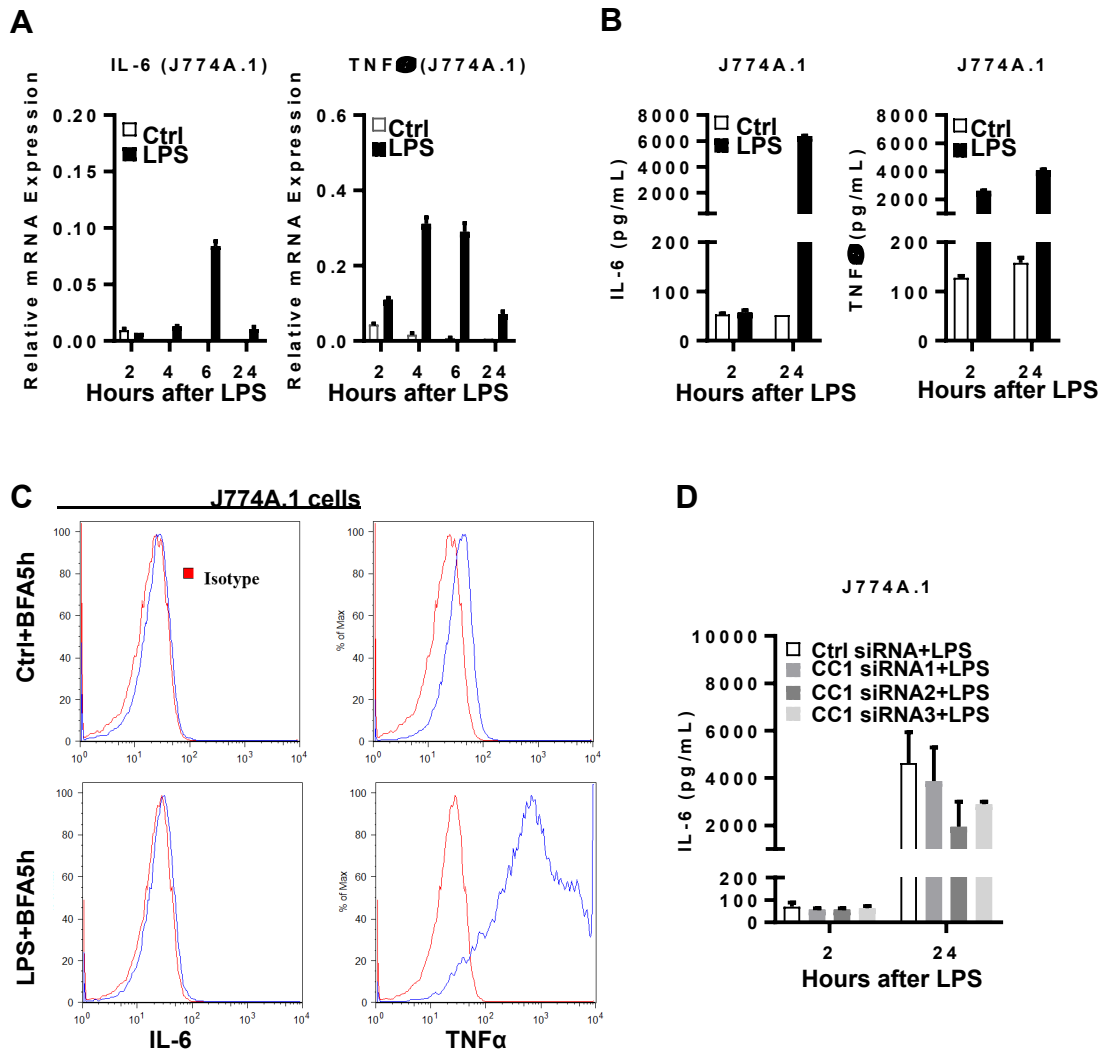

**Figure S7. Murine macrophage cell line J774A.1 does not produce IL-6 within 5 hours after LPS treatment, while silencing of CEACAM1 does not interfere with IL-6 production after LPS treatment at 2 hour and 24 hour points.**

(A) IL-6 and TNF $\alpha$  mRNA expression after treatment with LPS (n=3).

(B) IL-6 and TNF $\alpha$  level after treatment with LPS (n=3).

(C) Intracellular staining of IL-6 and TNF $\alpha$  of J774A.1 cells treated with LPS plus BFA for 5 hours (n=3)

(D) IL-6 levels of J774A.1 cells treated with LPS over time in which CEACAM1 was silenced by RNAi (n=3).



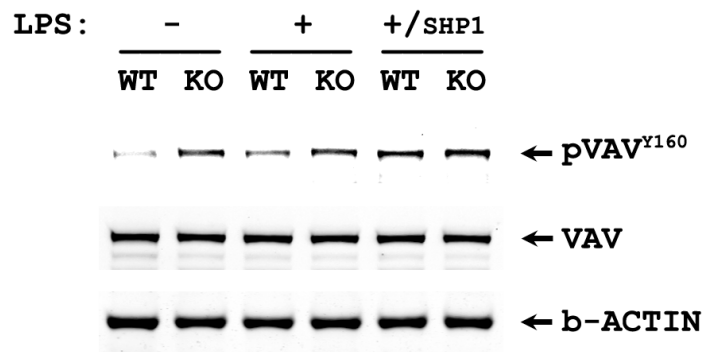

**Figure S8. PTP inhibitor III, a SHP1 inhibitor, increases levels of phospho-VAV1 in bone marrow monocytes of WT mice.**

Immunoblot analysis of pVAV1 and VAV1 in WT and CEACAM1 KO bone marrow monocytes pretreated with 193uM PTP inhibitor III for 20 minutes following 500ng/mL LPS treatment for 15 minutes.

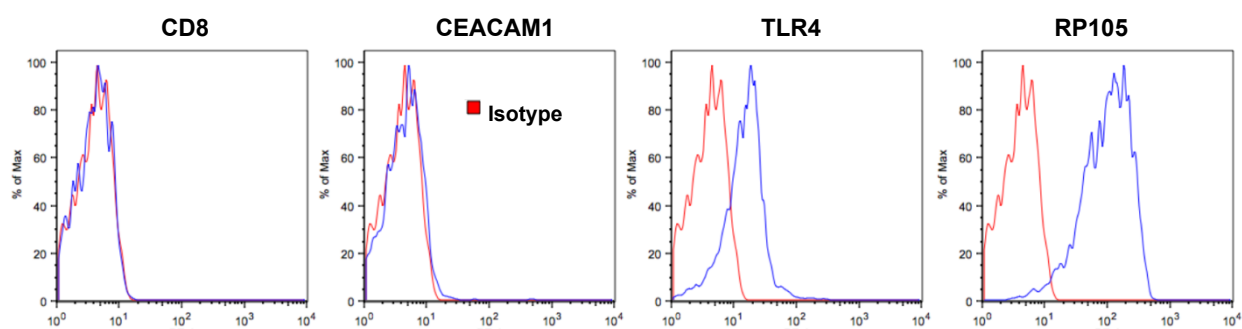

**Figure S9. CEACAM1, TLR4 and RP105 expression on human peripheral blood monocytes.**

Surface CD8 (negative control), CEACAM1, TLR4 and RP105 staining of CD14 positive monocytes of peripheral blood.
